# Supplementary material
Source: PubMed Central journal article supplement (PMC8570823)
Supplement: btab564_supplementary_data.pdf [file btab564_supplementary_data.pdf]

Supplementary material for “*Mediation Analysis for Survival Data with High-Dimensional Mediators*”

Haixiang Zhang, Yinan Zheng, Lifang Hou, Cheng Zheng, and Lei Liu

The supplementary material contains Table S.1 and Figures S.1-S.3 for the main document of this article.

**Table S.1.**

Bias and MSE (in the parenthesis) of estimation for mediation effects in simulation study 1 ( $n = 300$ )<sup>†</sup>.

| $\alpha_j\beta_j$       | CR=20%                                          |                                                | CR=40%                                          |                                                 |
|-------------------------|-------------------------------------------------|------------------------------------------------|-------------------------------------------------|-------------------------------------------------|
|                         | Proposed                                        | Luo <i>et al</i>                               | Proposed                                        | Luo <i>et al</i>                                |
| $\alpha_1\beta_1$       | -0.0196<br>(0.0043)                             | -0.2799<br>(0.1000)                            | -0.0293<br>(0.0060)                             | -0.3010<br>(0.1064)                             |
| $\alpha_2\beta_2$       | -0.1407<br>(0.0267)                             | -0.2500<br>(0.0625)                            | -0.1549<br>(0.0313)                             | -0.2500<br>(0.0625)                             |
| $\alpha_3\beta_3$       | -0.0206<br>(0.0017)                             | -0.0766<br>(0.0111)                            | -0.0232<br>(0.0022)                             | -0.1038<br>(0.0160)                             |
| $\alpha_4\beta_4$       | -0.0555<br>(0.0047)                             | -0.0900<br>(0.0081)                            | -0.0584<br>(0.0047)                             | -0.0900<br>(0.0081)                             |
| $\alpha_5\beta_5$       | -0.0253<br>(0.0013)                             | -0.0623<br>(0.0039)                            | -0.0317<br>(0.0016)                             | -0.0621<br>(0.0039)                             |
| $\alpha_6\beta_6$       | -0.0145<br>(0.0004)                             | -0.0225<br>(0.0005)                            | -0.0152<br>(0.0004)                             | -0.0225<br>(0.0005)                             |
| $\alpha_7\beta_7$       | -0.0471<br>(0.0047)                             | -0.2177<br>(0.0537)                            | -0.0398<br>(0.0048)                             | -0.2189<br>(0.0541)                             |
| $\alpha_8\beta_8$       | 0.0185<br>(0.0022)                              | -0.1152<br>(0.0143)                            | 0.0208<br>(0.0028)                              | -0.1151<br>(0.0143)                             |
| $\alpha_9\beta_9$       | 0.0004<br>(0.0015)                              | -0.0649<br>(0.0046)                            | 0.0031<br>(0.0022)                              | -0.0640<br>(0.0045)                             |
| $\alpha_{10}\beta_{10}$ | -0.0147<br>(0.0025)                             | -0.0600<br>(0.0036)                            | -0.0089<br>(0.0025)                             | -0.0600<br>(0.0036)                             |
| $\alpha_{11}\beta_{11}$ | $-6 \times 10^{-5}$<br>( $1.4 \times 10^{-5}$ ) | $8.2 \times 10^{-5}$<br>( $7 \times 10^{-6}$ ) | 0.0001<br>( $7.2 \times 10^{-6}$ )              | $-5.5 \times 10^{-5}$<br>( $6 \times 10^{-7}$ ) |
| $\alpha_{12}\beta_{12}$ | 0.0069<br>(0.0013)                              | 0<br>(0)                                       | 0.0143<br>(0.0014)                              | 0<br>(0)                                        |
| $\alpha_{13}\beta_{13}$ | $-4 \times 10^{-5}$<br>( $2.8 \times 10^{-7}$ ) | 0<br>(0)                                       | $-3 \times 10^{-5}$<br>( $6.6 \times 10^{-7}$ ) | 0<br>(0)                                        |

<sup>†</sup> “Proposed” denotes our method; “Luo *et al*” denotes Luo et al. (2020)’s method; “CR” denotes the censoring rate of failure times.

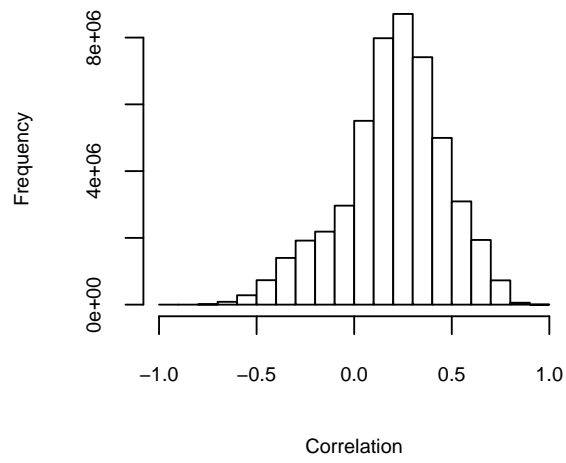

**Figure S.1** The histogram for elements in lower triangular matrix of  $\Sigma_e$ .

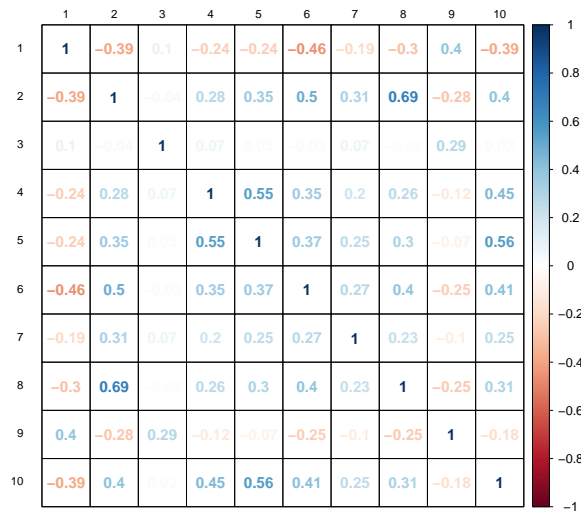

**Figure S.2** The  $10 \times 10$  upper sub-matrix of  $\Sigma_e$  towards the active mediators  $\{M_k\}_{k=1}^{10}$ .
